# Supplementary figures and images for: Association of two genomic variants with HPV type-specific risk of cervical cancer
Source: PubMed Central journal article supplement — Tumour Virus Res. 2023 Jul 25;16:200269. doi: 10.1016/j.tvr.2023.200269 (PMC10415783; doi:10.1016/j.tvr.2023.200269), 2023-07-25

**Supplementary Figure 1**

rs9357152 *Sau*96I

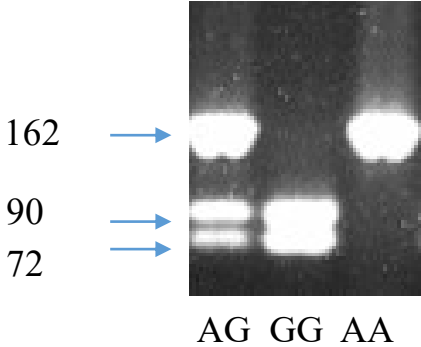

rs4243652 *Hpy*188III

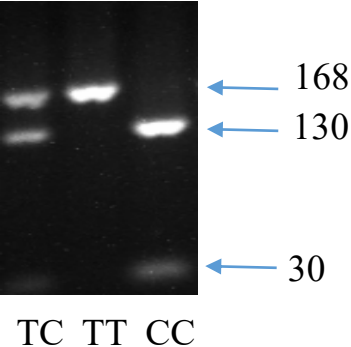

Supplement: mmc1.pdf [file mmc1.pdf]

## Supplementary Figure 2

rs9357152 AA

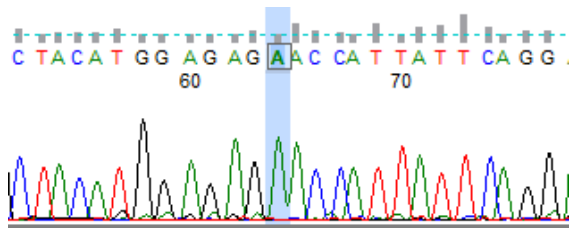

rs4243652 TT

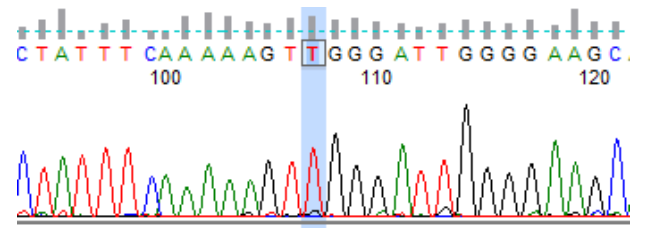

rs9357152 AG

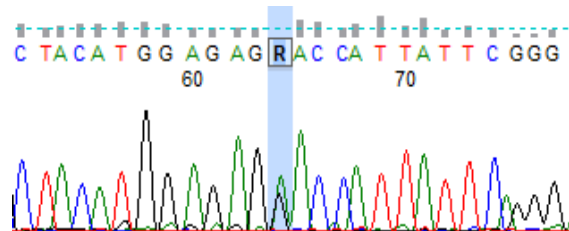

rs4243652 TC

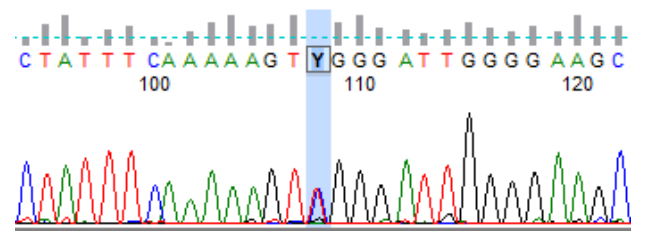

rs9357152 GG

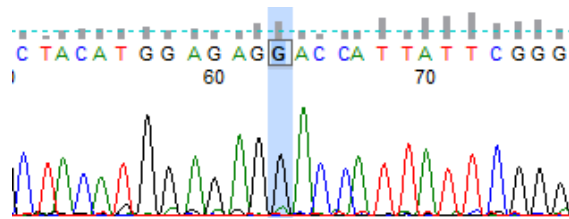

rs4243652 CC

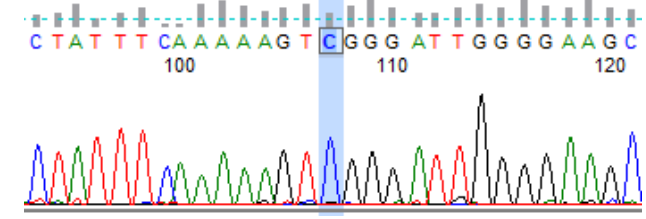

Supplement: mmc2.pdf [file mmc2.pdf]

# Supplementary Figure 3

## rs9357152

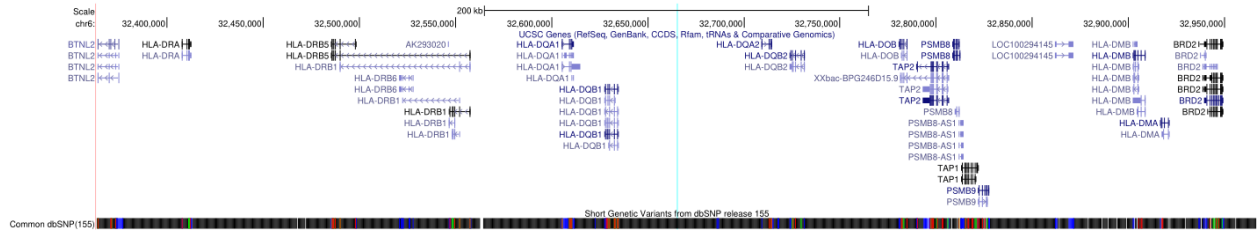

## rs4243652

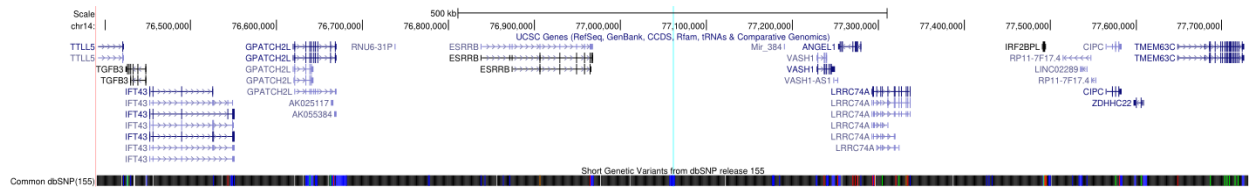

Supplement: mmc3.pdf [file mmc3.pdf]

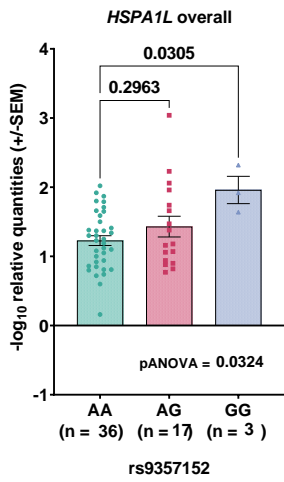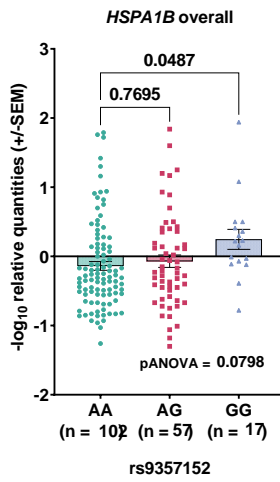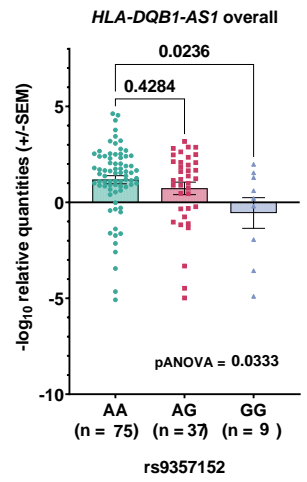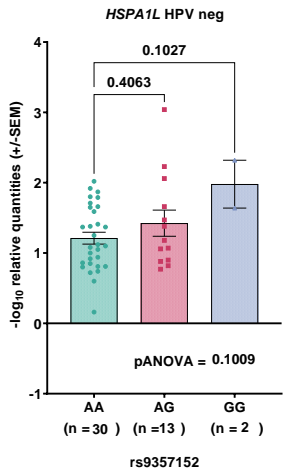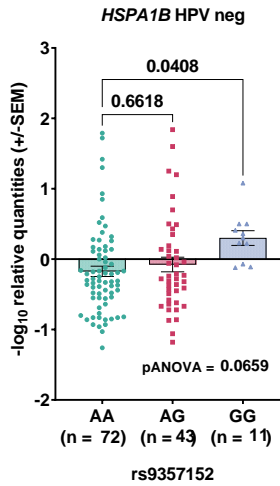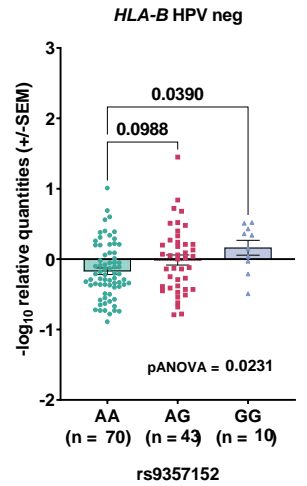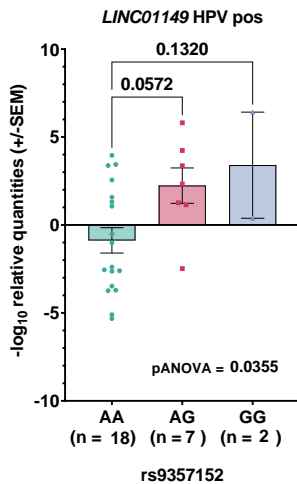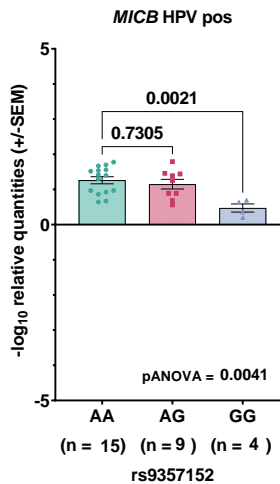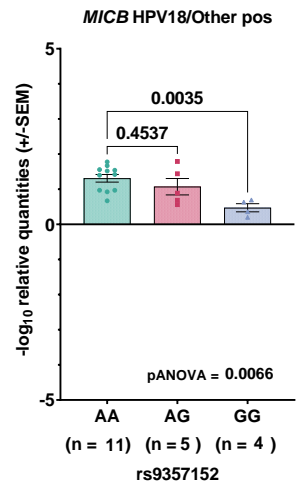

Supplement: mmc4.pdf [file mmc4.pdf]
